# Supplementary material
Source: PubMed Central journal article supplement (PMC4413433)
Supplement: NIHMS62307-supplement-2.pdf [file NIHMS62307-supplement-2.pdf]

**Supplementary Data Table 1 | Parameter values of the multiple-exponential equation (5) used to simulate the time course of synaptic conductances.**

|                |    | ratio to AMPA direct | n    | $\tau_r$ (ms) | d1 (%) | $\tau d1$ (ms) | d2 (%) | $\tau d2$ (ms) | d3 (%) | $\tau d3$ (ms) |
|----------------|----|----------------------|------|---------------|--------|----------------|--------|----------------|--------|----------------|
| AMPA direct    | G1 |                      | 1.94 | 0.13          | 89.38  | 0.27           | 9.57   | 1              | 1.05   | 0.1            |
|                | G2 |                      | 1.94 | 0.13          | 89.38  | 0.32           | 9.57   | 1.5            | 1.05   | 0.2            |
|                | G3 |                      | 1.94 | 0.13          | 89.38  | 0.32           | 9.57   | 1.73           | 1.05   | 10             |
|                | G4 |                      | 1.94 | 0.13          | 89.38  | 0.32           | 9.57   | 1.73           | 1.05   | 10             |
|                | G5 |                      | 1.94 | 0.16          | 89.38  | 0.32           | 9.57   | 1.73           | 1.05   | 20             |
| AMPA Spillover | G1 | 0.34                 | 1.74 | 0.3           | 68     | 0.4            | 70     | 1              | 30     | 10             |
|                | G2 | 0.34                 | 1.74 | 0.38          | 68     | 0.7            | 50     | 3              | 30     | 20             |
|                | G3 | 0.34                 | 1.74 | 0.38          | 80     | 0.7            | 55     | 5              | 30     | 20             |
|                | G4 | 0.34                 | 1.74 | 0.38          | 80     | 0.7            | 55     | 5              | 30     | 20             |
|                | G5 | 0.34                 | 1.74 | 0.38          | 80     | 0.7            | 55     | 6              | 40     | 30.86          |
| NMDA           | G1 | 0.1                  | 1    | 1.14          | 61.41  | 8.1            | 35.88  | 37             |        |                |
|                | G2 | 0.1                  | 1    | 1.14          | 61.41  | 8.1            | 35.88  | 37             |        |                |
|                | G3 | 0.1                  | 1    | 1.14          | 61.41  | 8.1            | 35.88  | 37             |        |                |
|                | G4 | 0.1                  | 1    | 1.14          | 61.41  | 8.1            | 35.88  | 37             |        |                |
|                | G5 | 0.1                  | 1    | 1.14          | 61.41  | 8.1            | 35.88  | 37             |        |                |

**Supplementary Data Table 2 | Parameter values used to simulate the short-term plasticity of synaptic conductances.**

|                       |           | <b>D</b> | <b><math>\tau_D</math> (ms)</b> | <b>F</b> | <b>Fmax</b> | <b><math>\tau_F</math> (ms)</b> |
|-----------------------|-----------|----------|---------------------------------|----------|-------------|---------------------------------|
| <b>AMPA direct</b>    | <b>G1</b> | 0.4      | 50                              |          |             |                                 |
|                       | <b>G2</b> | 0.7      | 50                              |          |             |                                 |
|                       | <b>G3</b> | 0.75     | 50                              |          |             |                                 |
|                       | <b>G4</b> | 0.85     | 50                              |          |             |                                 |
|                       | <b>G5</b> | 0.75     | 50                              | 2.2      | 2.2         | 30                              |
| <b>AMPA Spillover</b> | <b>G1</b> | 0.6      | 50                              |          |             |                                 |
|                       | <b>G2</b> | 0.7      | 50                              |          |             |                                 |
|                       | <b>G3</b> | 0.85     | 50                              |          |             |                                 |
|                       | <b>G4</b> | 0.95     | 50                              |          |             |                                 |
|                       | <b>G5</b> | 0.95     | 50                              |          |             |                                 |
| <b>NMDA</b>           | <b>G1</b> | 0.6      | 70                              |          |             |                                 |
|                       | <b>G2</b> | 0.85     | 70                              |          |             |                                 |
|                       | <b>G3</b> | 0.9      | 70                              | 1.7      | 3.5         | 3.5                             |
|                       | <b>G4</b> | 0.9      | 70                              | 2        | 4.5         | 30                              |
|                       | <b>G5</b> | 0.9      | 70                              | 2.5      | 5           | 30                              |
